# Supplementary material for: Mono- and binuclear chiral N,N,O-scorpionate zinc alkyls as efficient initiators for the ROP of rac-lactide
Source: Royal Society of Chemistry journal article supplement (doi:10.1039/c7dt03045b), 2017-01-01
Supplement: c7dt03045b1.pdf [file c7dt03045b1.pdf]

ELECTRONIC SUPPLEMENTARY INFORMATION

Mono- and Binuclear Chiral N,N,O-Scorpionate Zinc  
Alkyls as Efficient Initiators for the ROP of *rac*-  
Lactide.

*Antonio Otero,<sup>\*,a</sup> Juan Fernández-Baeza,<sup>\*,a</sup> Luis F. Sánchez-Barba,<sup>\*,b</sup> Sonia Sobrino,<sup>a</sup> Andrés Garcés,<sup>b</sup>  
Agustín Lara-Sánchez,<sup>a</sup> and Ana M. Rodríguez<sup>a</sup>*

<sup>a</sup>Prof. Dr. Antonio Otero, Dr. Juan Fernández-Baeza, Dña. Sonia Sobrino Dr Agustín Lara-Sánchez, Dr. Ana M. Rodríguez.

*Universidad de Castilla-La Mancha, Departamento de Química Inorgánica, Orgánica y Bioquímica-  
Centro de Innovación en Química Avanzada (ORFEO-CINQA), Campus Universitario, 13071-Ciudad  
Real, Spain.*

E-mail: [antonio.otero@uclm.es](mailto:antonio.otero@uclm.es); [juan.fbaeza@uclm.es](mailto:juan.fbaeza@uclm.es);

<sup>b</sup>Dr. Luis F. Sánchez-Barba, Dr. Andrés Garcés.

*Universidad Rey Juan Carlos, Departamento de Biología y Geología, Física y Química Inorgánica,  
Móstoles-28933-Madrid, Spain.*

E-mail: [luisfernando.sanchezbarba@urjc.es](mailto:luisfernando.sanchezbarba@urjc.es)

## Table of Contents

|                                                                                                                                                              |     |
|--------------------------------------------------------------------------------------------------------------------------------------------------------------|-----|
| 1) NMR characterization for complexes <b>1-3</b> , <b>4</b> , <b>7</b> , <b>10</b> , <b>13</b> , <b>15</b> and <b>17</b> :                                   |     |
| <b>Figure S1-S9.</b> $^1\text{H}$ and $^{13}\text{C}\{^1\text{H}\}$ NMR spectra.....                                                                         | S4  |
| 2) Dynamic behavior studies:                                                                                                                                 |     |
| <b>Figure S10.</b> $^1\text{H}$ NMR spectrum for complex <b>13</b> at 25 and 60°C in thf-<br><i>d</i> <sub>8</sub> .....                                     | S13 |
| <b>Figure S11.</b> $^1\text{H}$ NMR spectrum for complex <b>13</b> and $\text{ZnMe}_2$ at 25°C in thf-<br><i>d</i> <sub>8</sub> .....                        | S14 |
| 3) Ring-opening polymerization of <i>rac</i> -lactide details:                                                                                               |     |
| <b>Figure S12.</b> GPC trace corresponding to a poly( <i>rac</i> -lactide) sample.....                                                                       | S15 |
| <b>Figure S13.</b> Plot of PLA $M_n$ and molecular weight distribution values (PDI) as a function of<br>monomer conversion (%) employing <b>7</b> .....      | S16 |
| <b>Figure S14.</b> Selected area of MALDI-ToF mass spectra of poly( <i>rac</i> -lactide) synthesized using<br>initiators <b>7</b> and <b>8</b> .....         | S17 |
| <b>Figure S15.</b> Pseudo-first-order kinetic plots for <i>rac</i> -LA polymerizations employing <b>7</b> .....                                              | S19 |
| <b>Figure S16.</b> Plots of $\ln k_{\text{app}}$ versus $\ln [\text{catalyst}]_0$ for the polymerization of <i>rac</i> -LA employing<br><b>7</b> .....       | S20 |
| <b>Table S1.</b> Rate constants dependence on the initial catalyst concentration for <b>7</b> .....                                                          | S21 |
| <b>Figure S17.</b> $^1\text{H}$ NMR spectrum of poly( <i>rac</i> -lactide) showing the chain-end <i>termini</i> .....                                        | S22 |
| <b>Figure S18.</b> $^1\text{H}$ NMR spectrum of the homodecoupled <i>CH</i> resonance of poly( <i>rac</i> -lactide)<br>prepared from catalyst <b>6</b> ..... | S23 |
| 4) X-ray diffraction experimental details:                                                                                                                   |     |
| <b>Table S2.</b> Crystal data and structure refinement for <b>4</b> and <b>5</b> .....                                                                       | S24 |

5) References.....S25

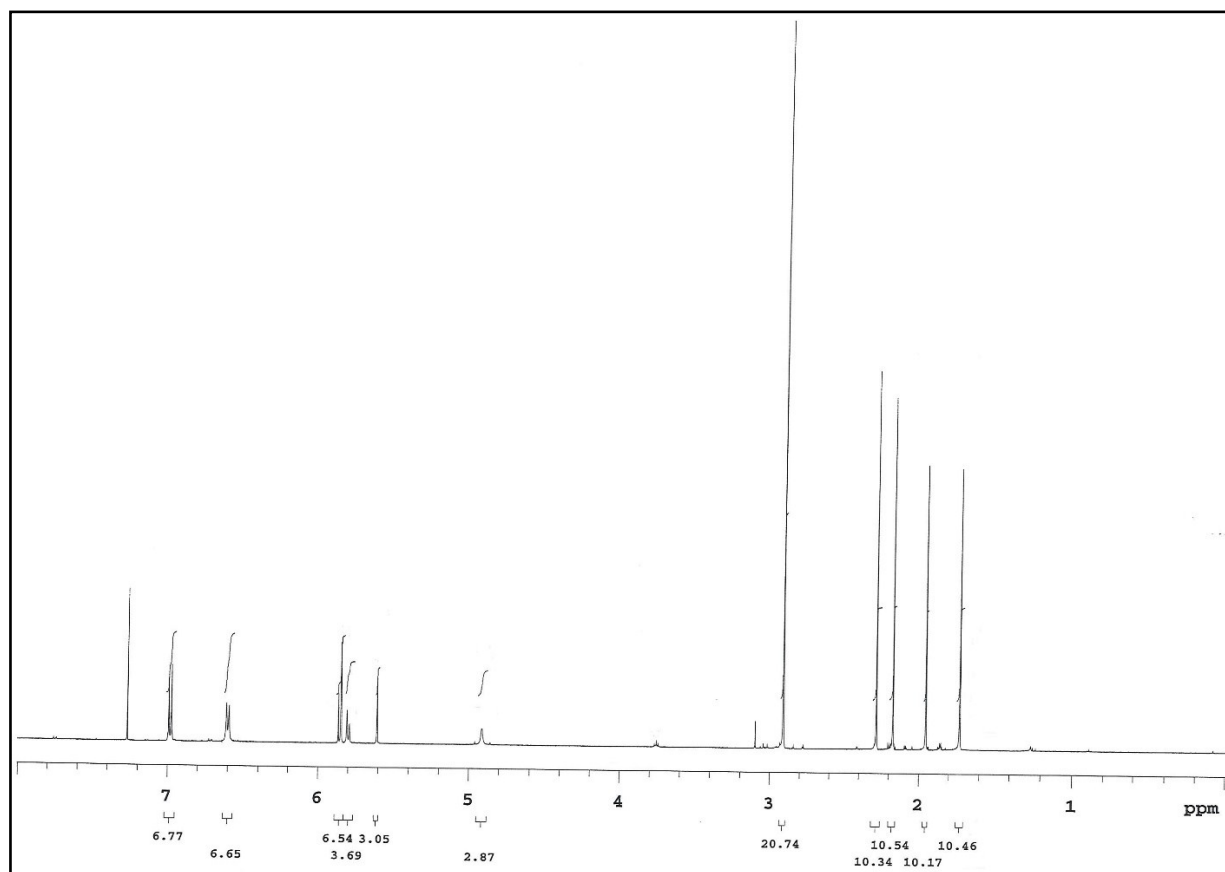

**Figure S1a.**  $^1\text{H}$  NMR spectrum of compound bpzampeH (1).

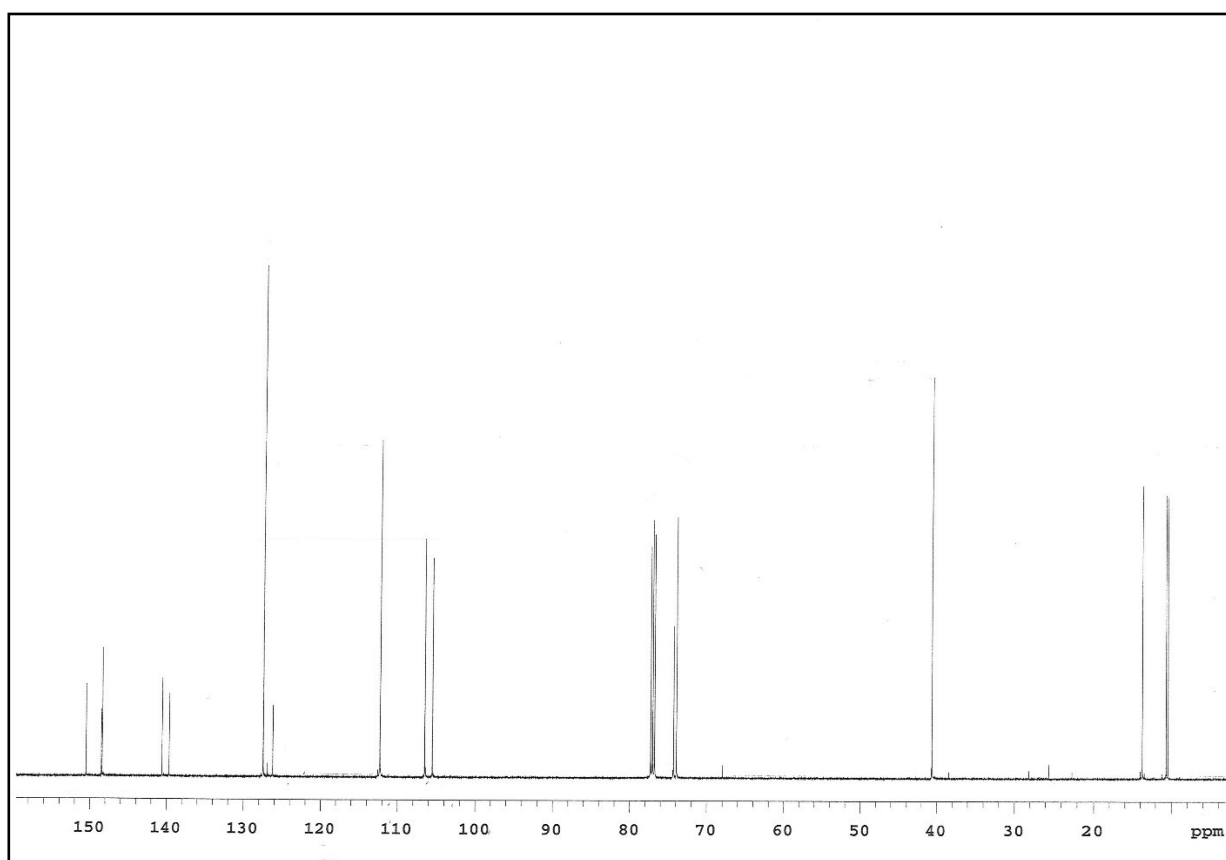

**Figure S1b.**  $^{13}\text{C}\{^1\text{H}\}$  NMR spectrum of compound bpzampeH (1).

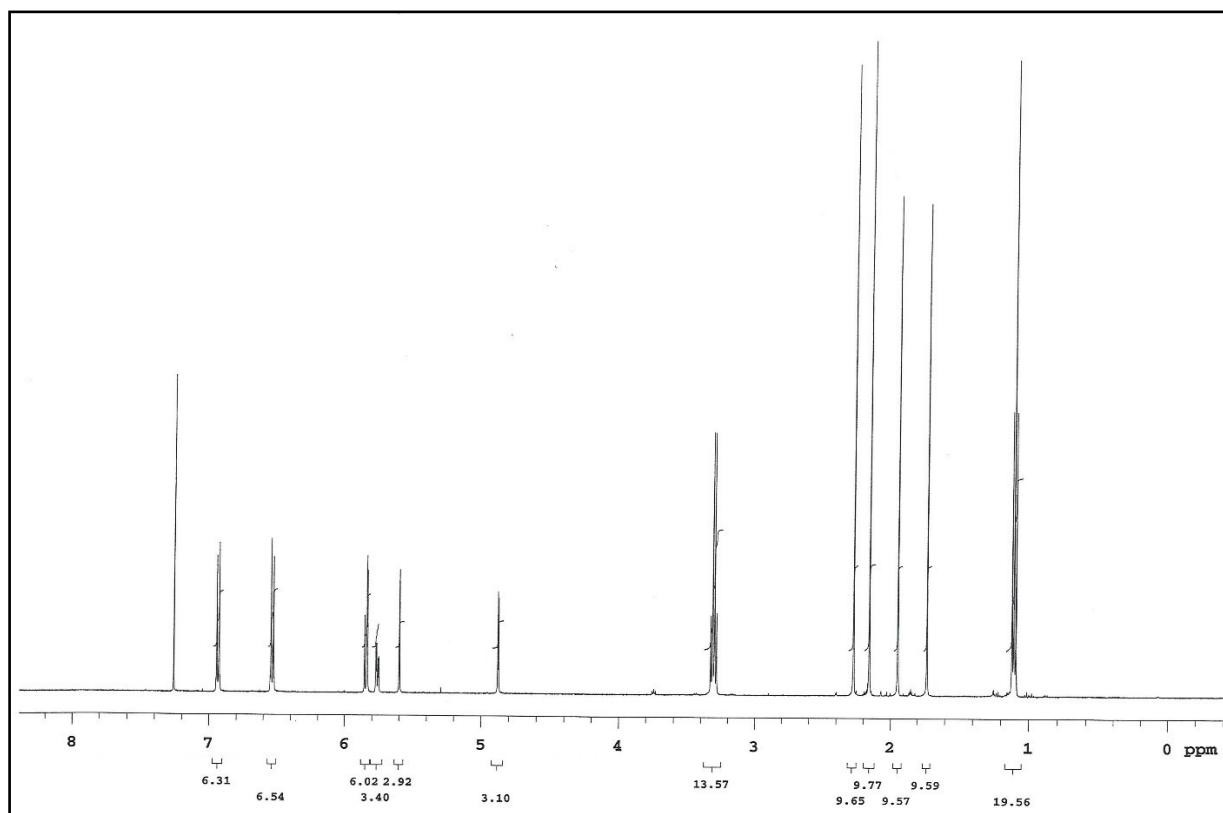

Figure S2a.  $^1\text{H}$  NMR spectrum of compound bpzaepeH (2).

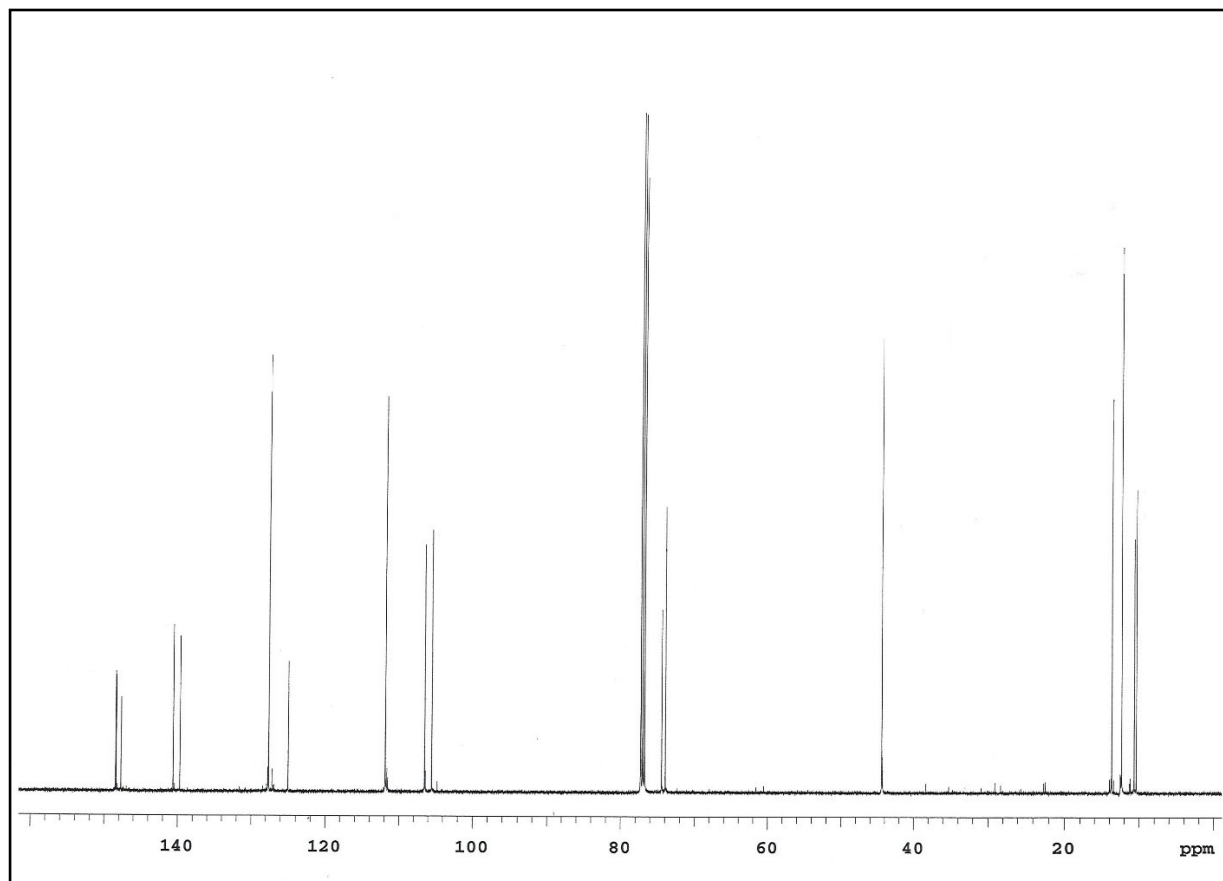

Figure S2b.  $^{13}\text{C}\{^1\text{H}\}$  NMR spectrum of compound bpzaepeH (2).

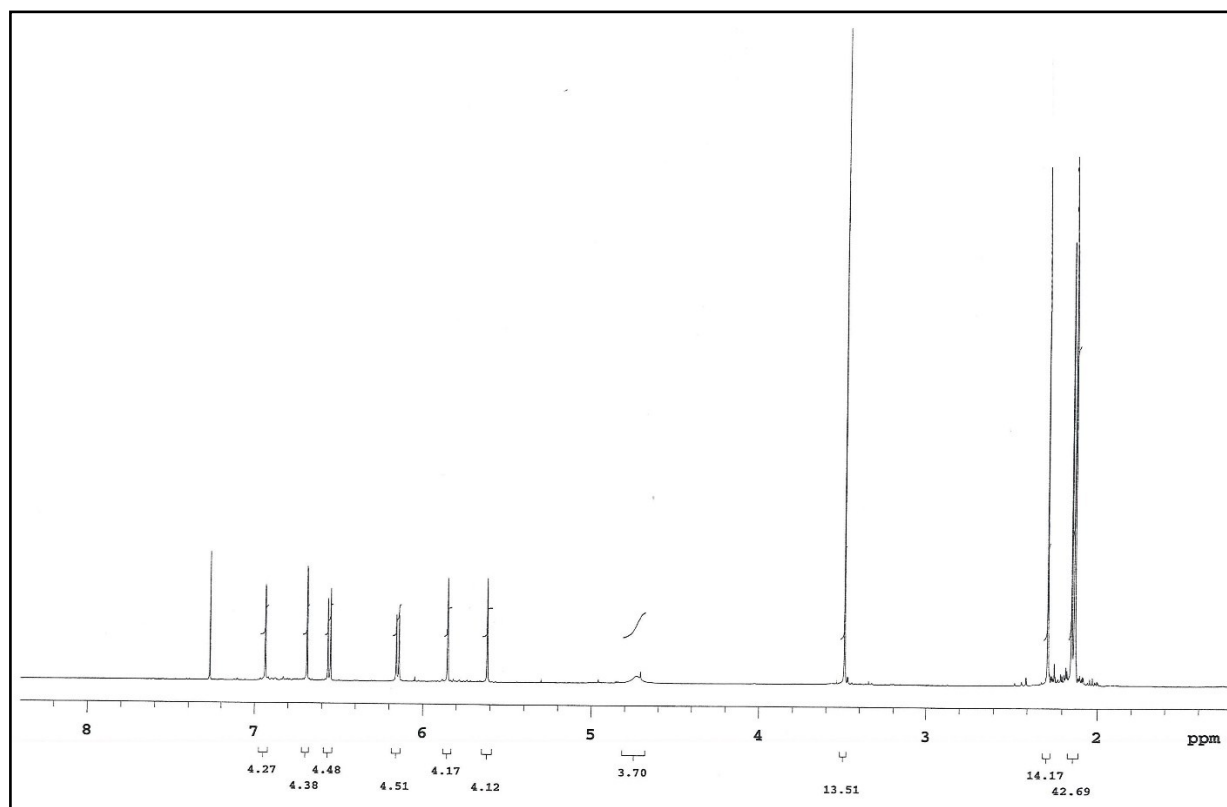

**Figure S3a.** <sup>1</sup>H NMR spectrum of compound bpzimeH (3).

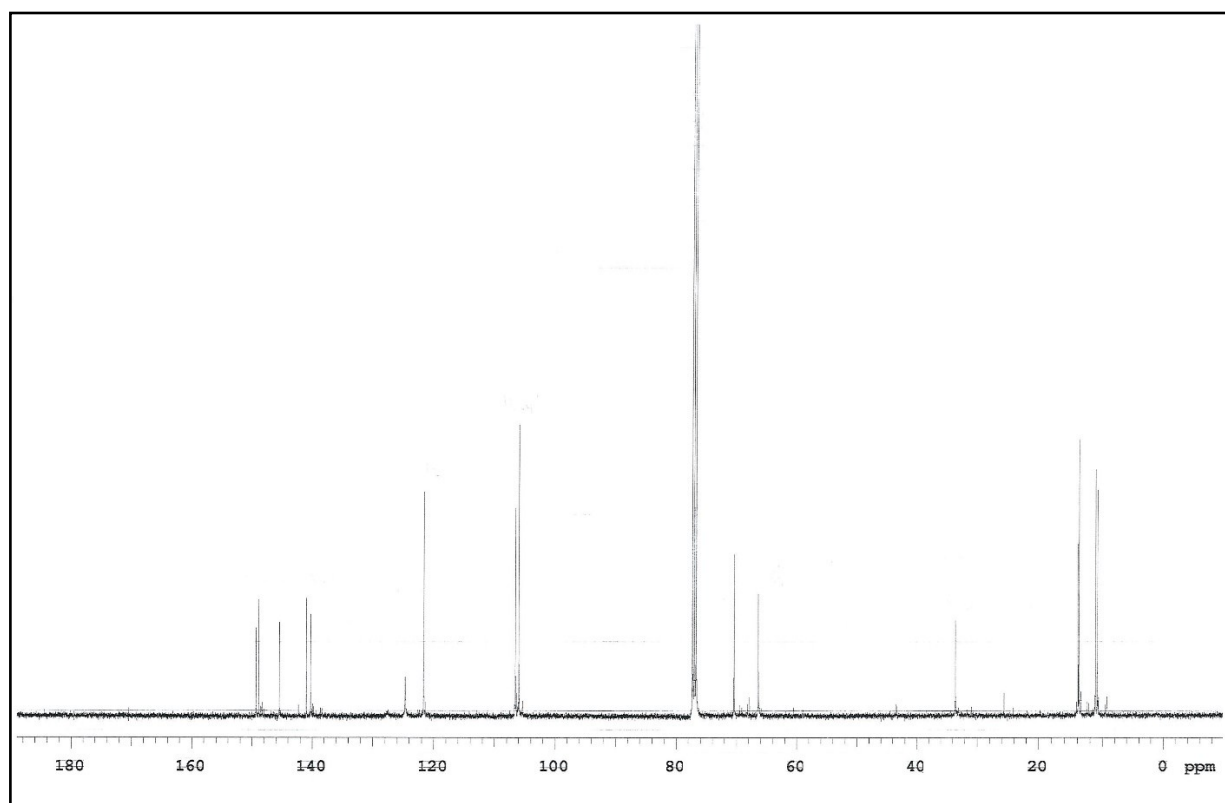

**Figure S3b.** <sup>13</sup>C {<sup>1</sup>H} NMR spectrum of compound bpzimeH (3).

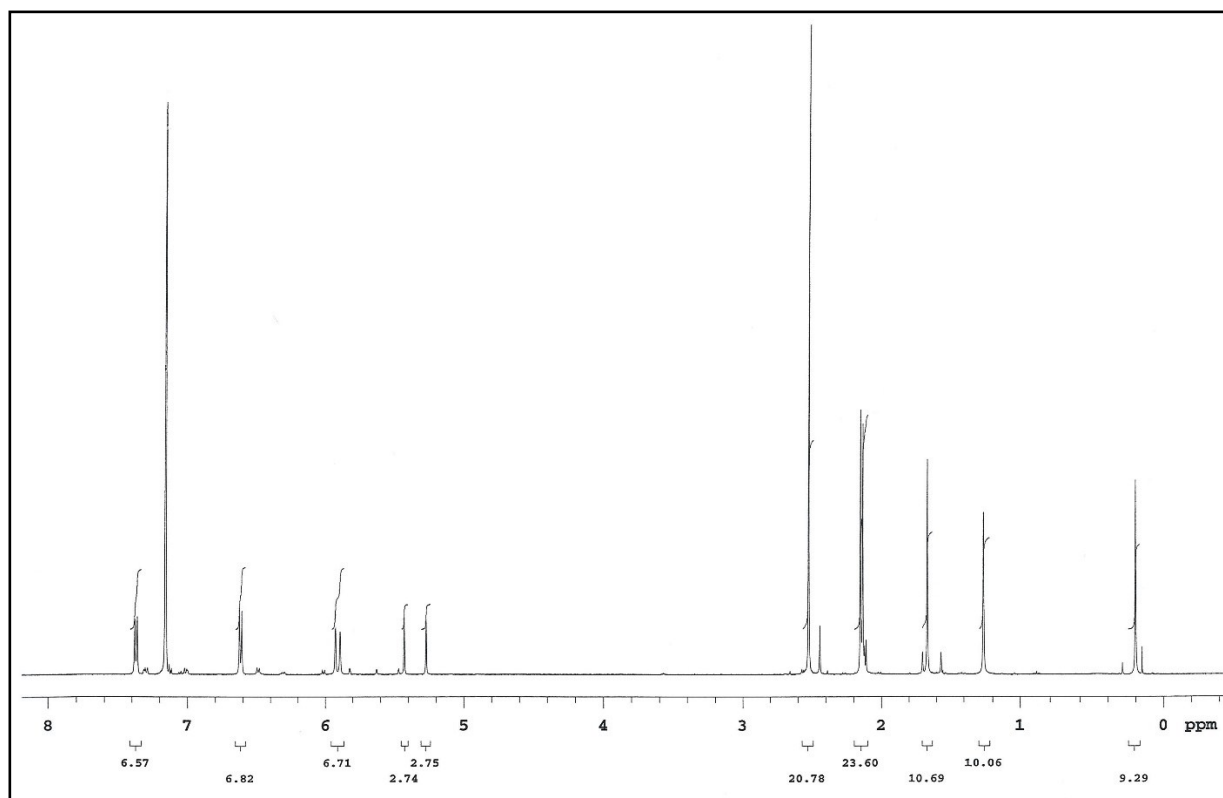

**Figure S4a.**  $^1\text{H}$  NMR spectrum of complex  $[\text{Zn}(\text{Me})(\text{bpzampe})]$  (**4**).

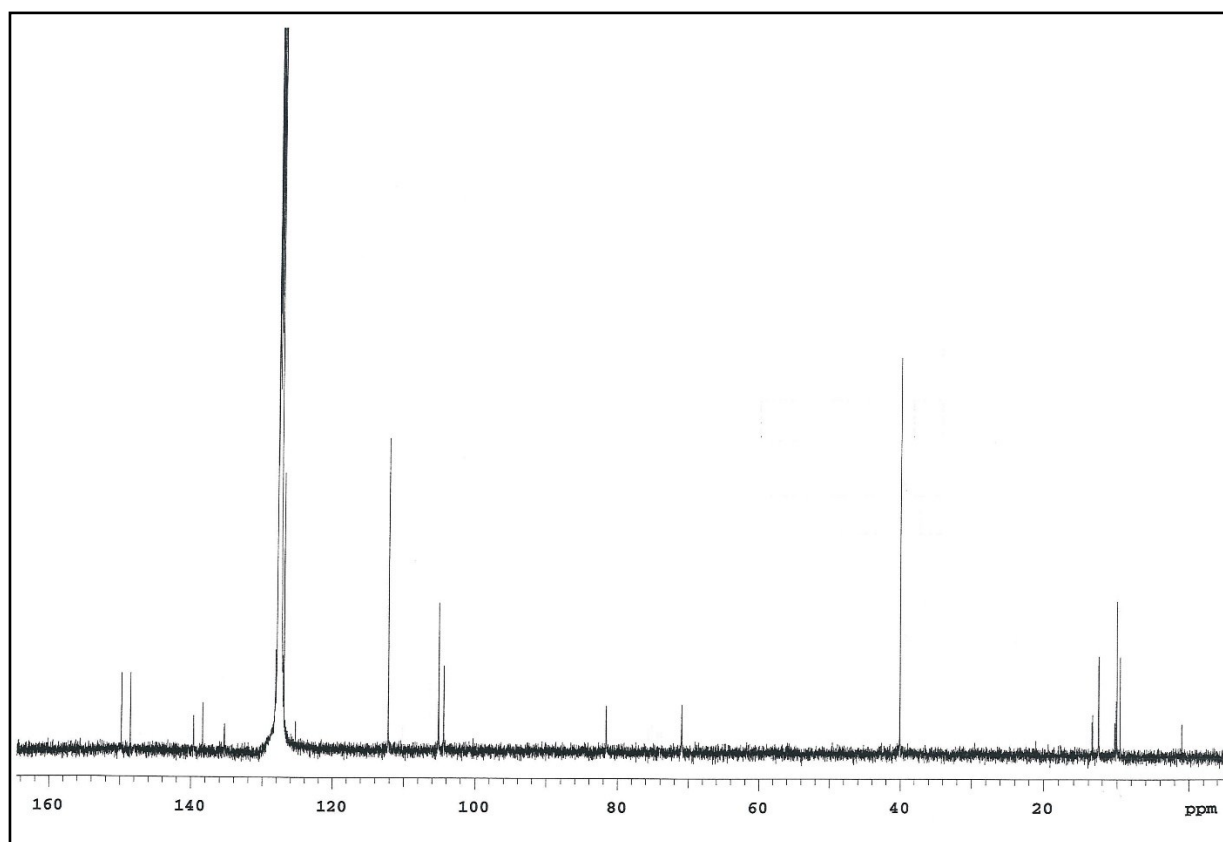

**Figure S4b.**  $^{13}\text{C}\{^1\text{H}\}$  NMR spectrum of complex  $[\text{Zn}(\text{Me})(\text{bpzampe})]$  (**4**).

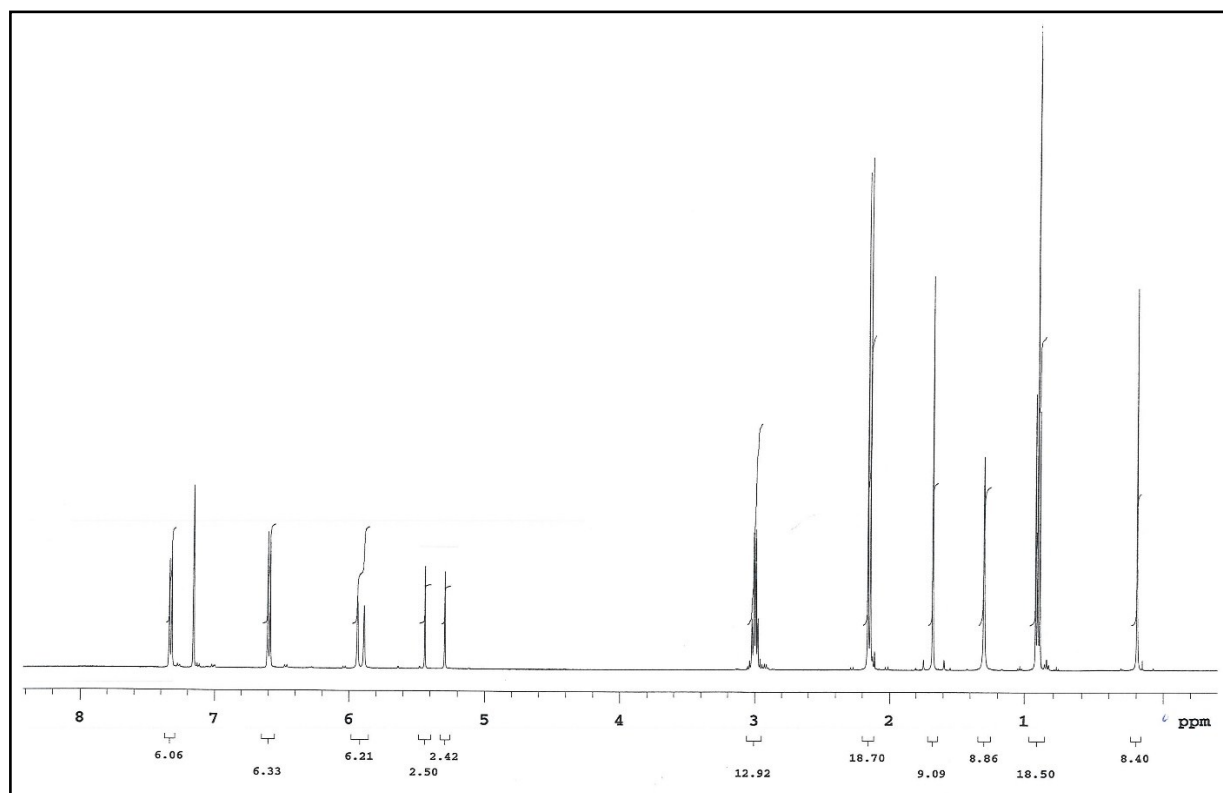

**Figure S5a.**  $^1\text{H}$  NMR spectrum of complex [Zn(Me)(bpzaepe)] (7).

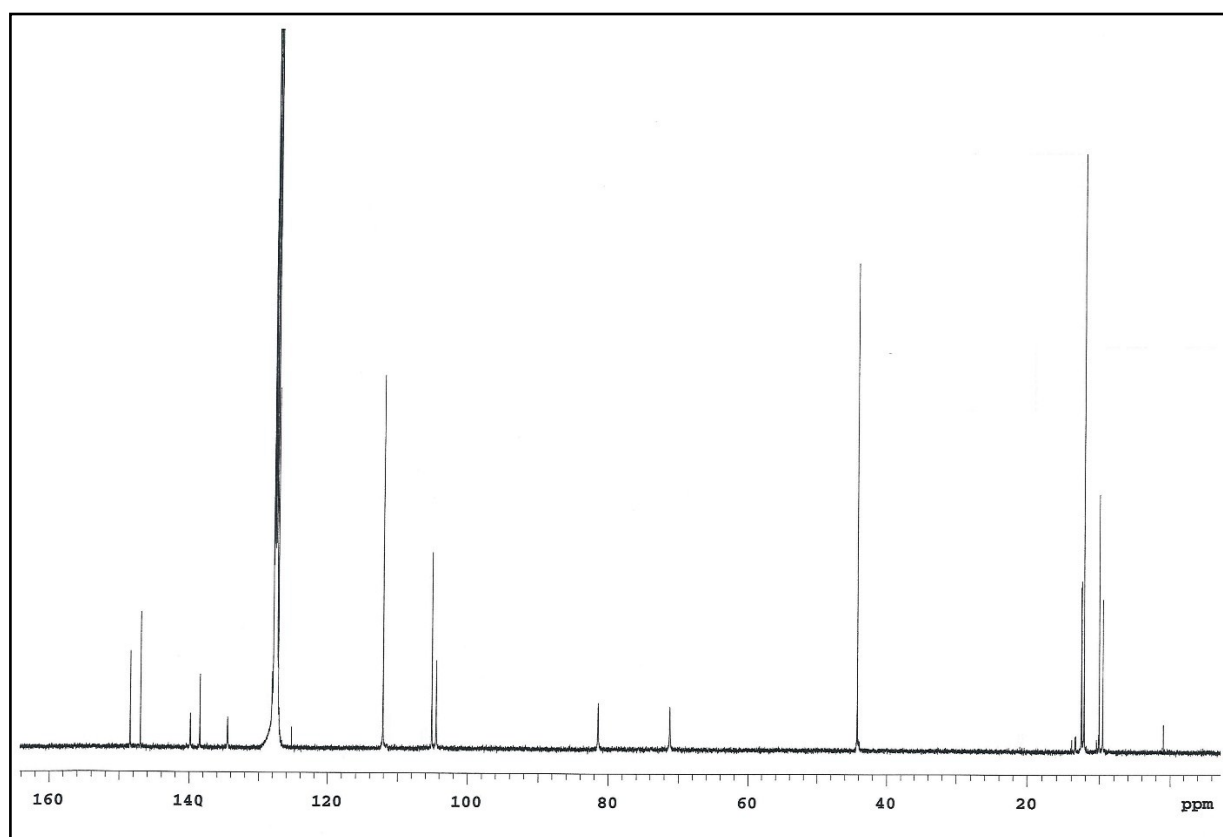

**Figure S5b.**  $^{13}\text{C}\{^1\text{H}\}$  NMR spectrum of complex [Zn(Me)(bpzaepe)] (7).



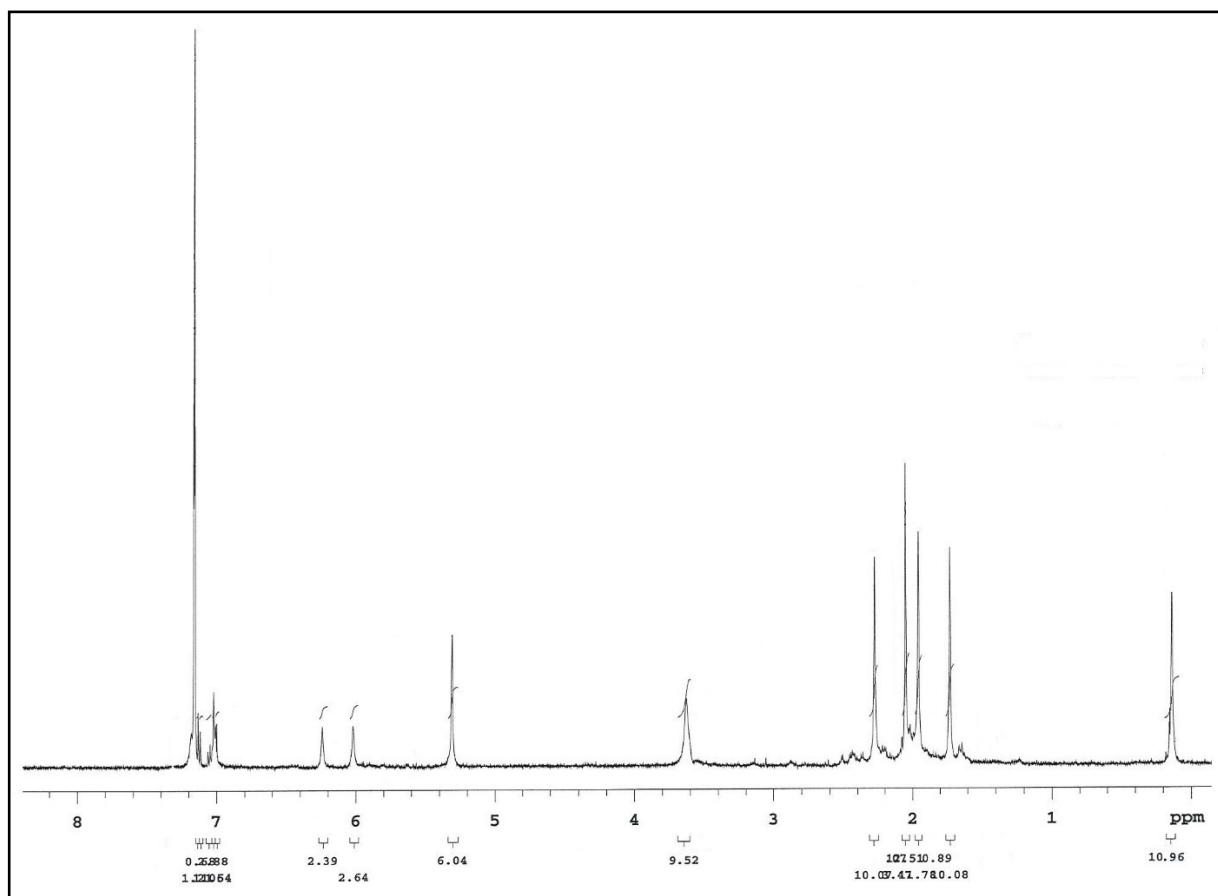

**Figure S6a.**  $^1\text{H}$  NMR spectrum of complex  $[\text{Zn}(\text{Me})(\text{bpzime})]$  (10).

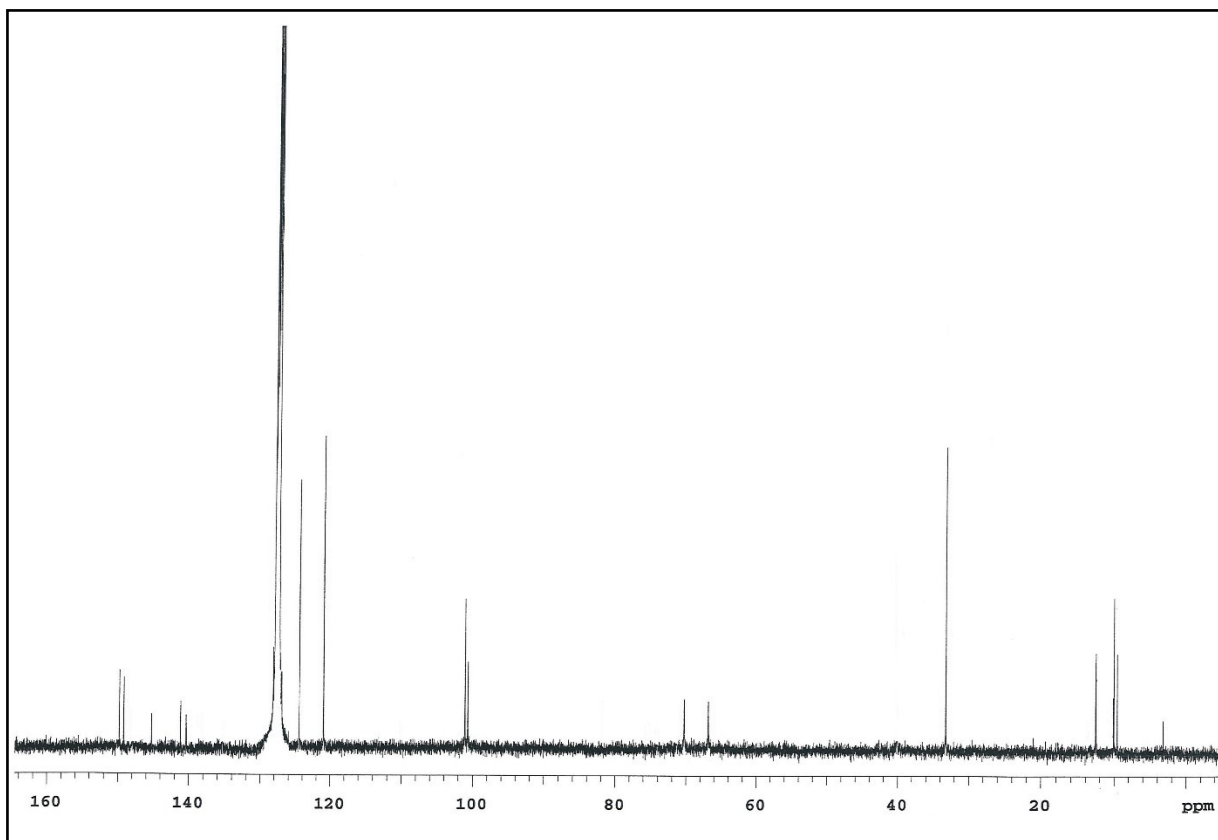

**Figure S6b.**  $^{13}\text{C}\{^1\text{H}\}$  NMR spectrum of complex  $[\text{Zn}(\text{Me})(\text{bpzime})]$  (10).

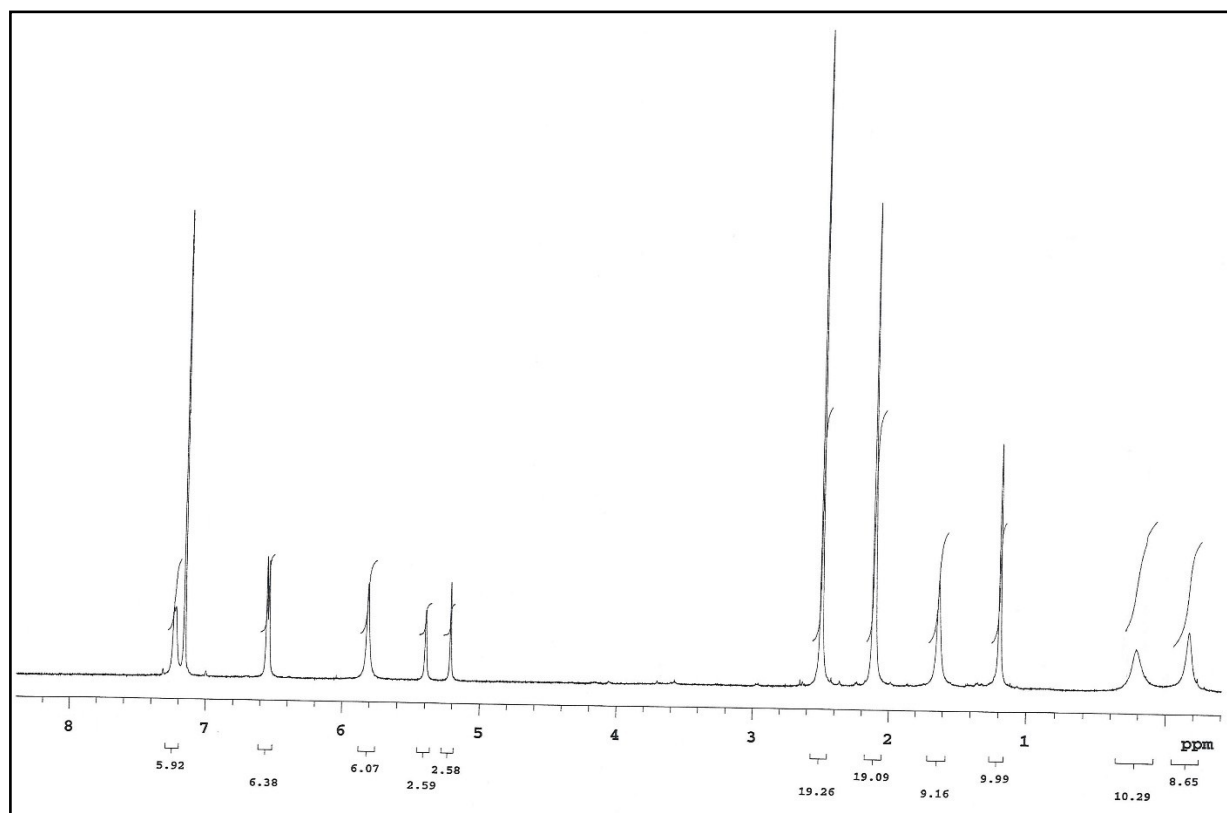

**Figure S7a.**  $^1\text{H}$  NMR spectrum of complex  $[\text{Zn}(\text{Me})(\text{bpzampe})\text{Zn}(\text{Me})_2]$  (**13**).

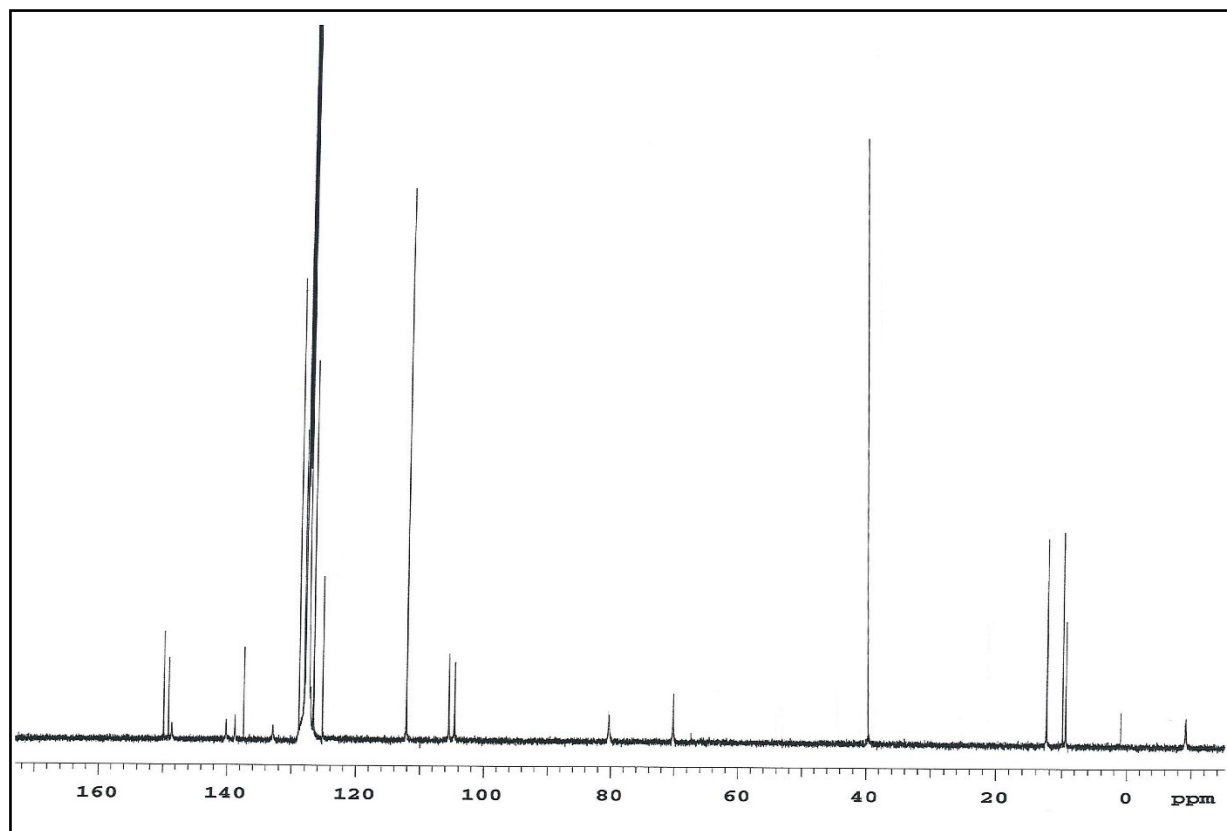

**Figure S7b.**  $^{13}\text{C}\{^1\text{H}\}$  NMR spectrum of complex  $[\text{Zn}(\text{Me})(\text{bpzampe})\text{Zn}(\text{Me})_2]$  (**13**).

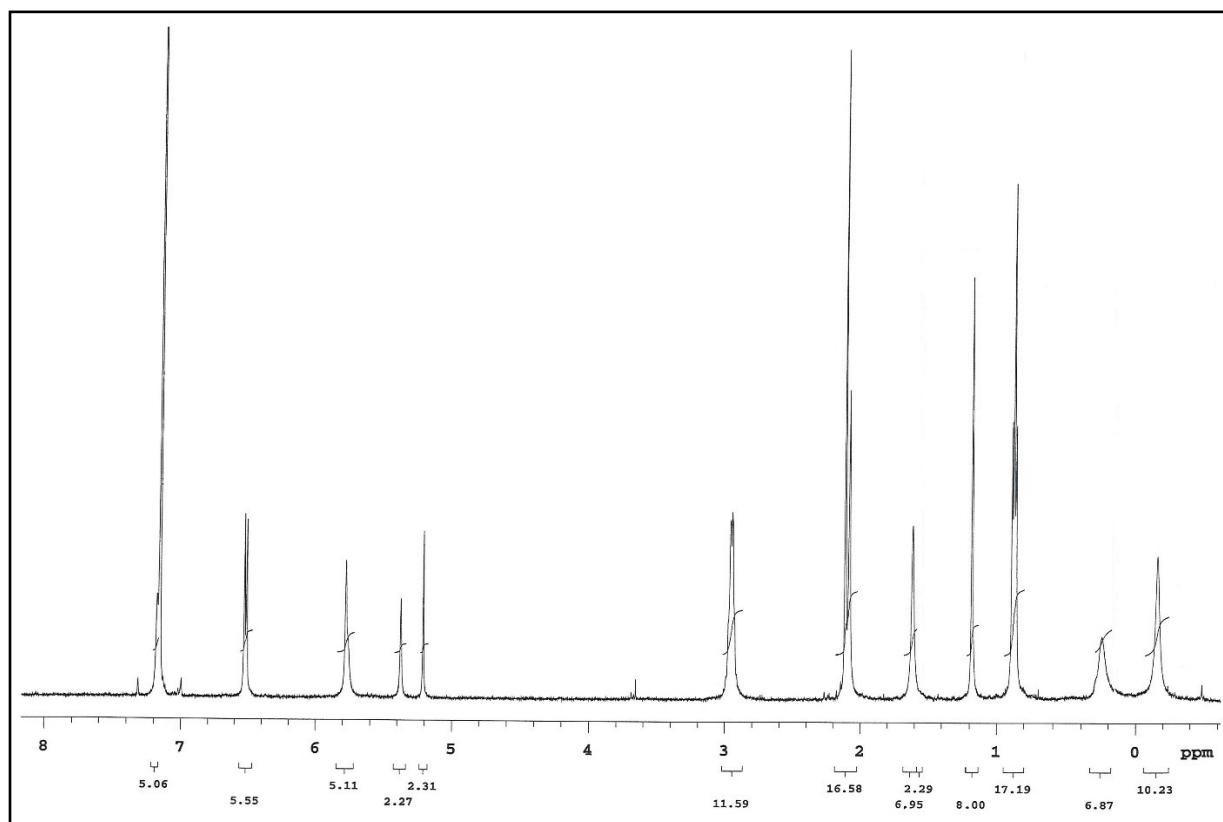

**Figure S8a.**  $^1\text{H}$  NMR spectrum of complex  $[\text{Zn}(\text{Me})(\text{bpzaepe})\text{Zn}(\text{Me})_2]$  (**15**).

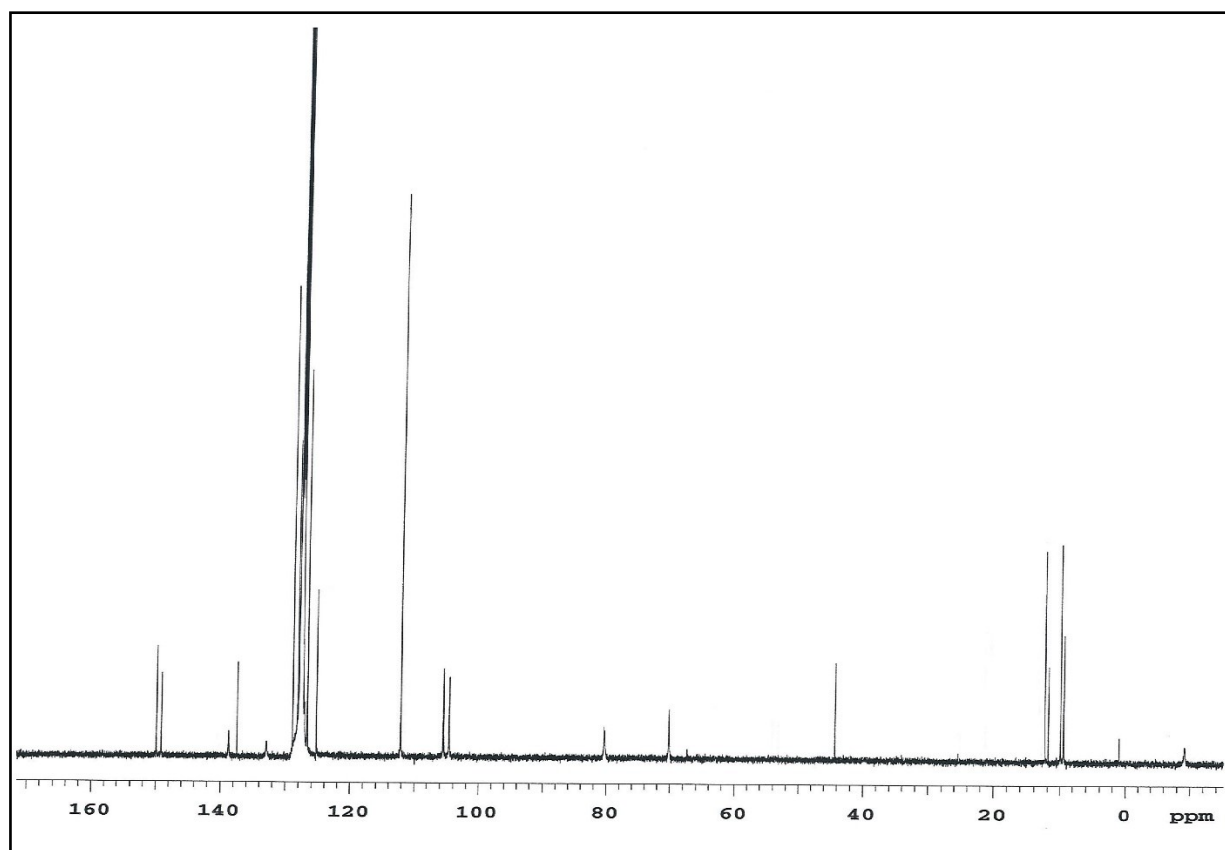

**Figure S8b.**  $^{13}\text{C}\{^1\text{H}\}$  NMR spectrum of complex  $[\text{Zn}(\text{Me})(\text{bpzaepe})\text{Zn}(\text{Me})_2]$  (**15**).

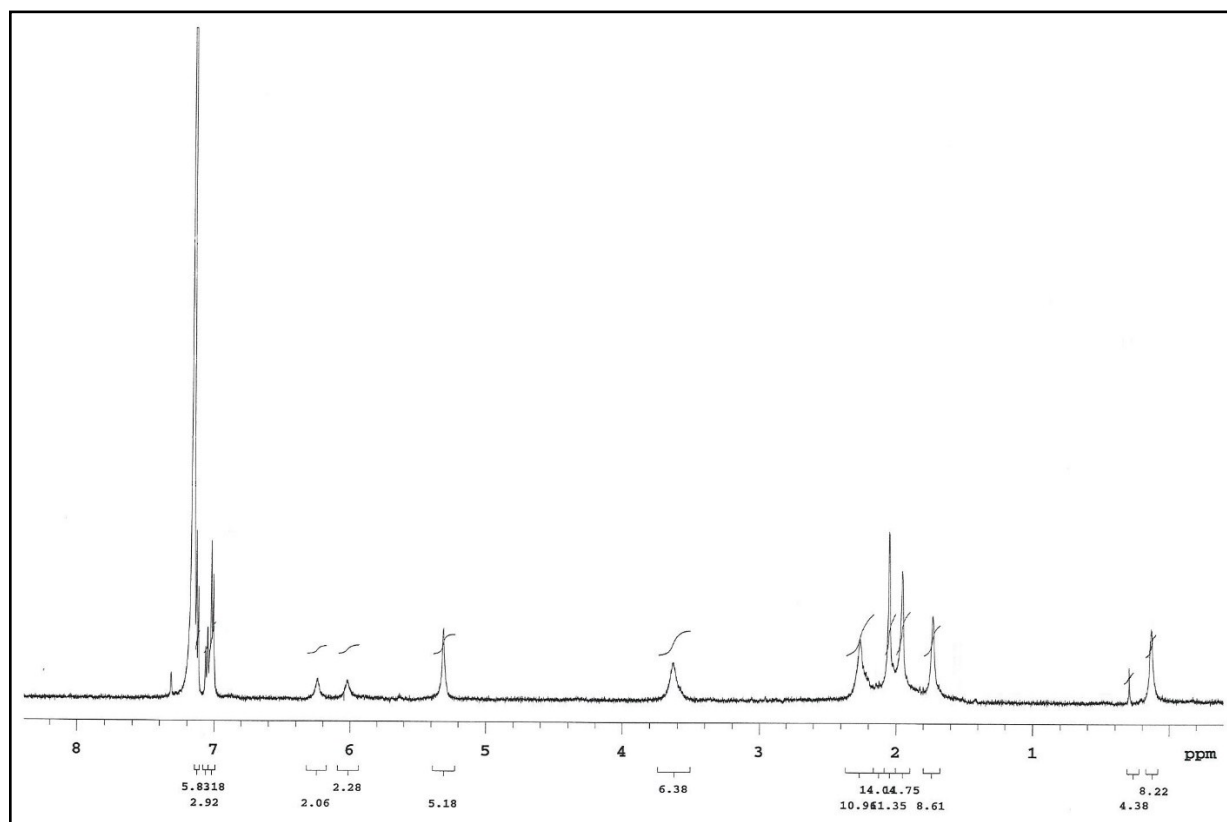

Figure S9a.  $^1\text{H}$  NMR spectrum of complex  $[\text{Zn}(\text{Me})(\text{bpzime})\text{Zn}(\text{Me})_2]$  (17).

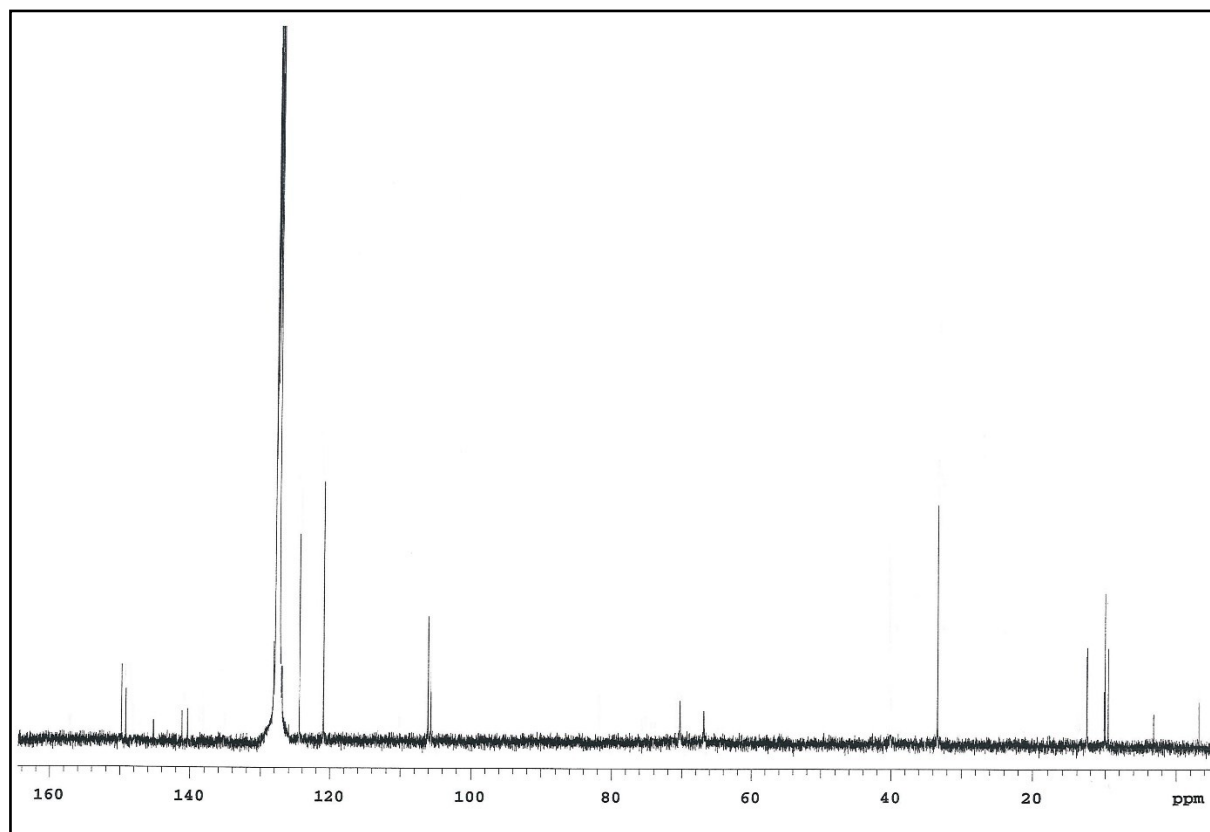

Figure S9b.  $^{13}\text{C}\{^1\text{H}\}$  NMR spectrum of complex  $[\text{Zn}(\text{Me})(\text{bpzime})\text{Zn}(\text{Me})_2]$  (17).

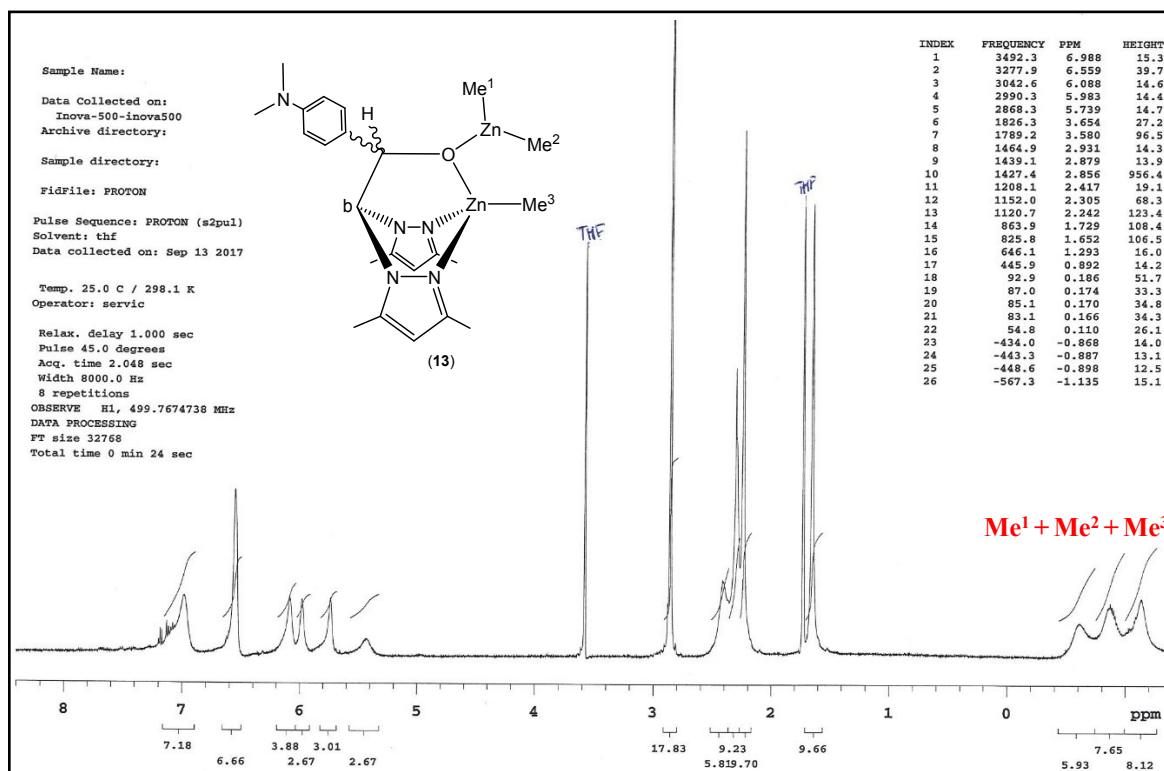

(a)

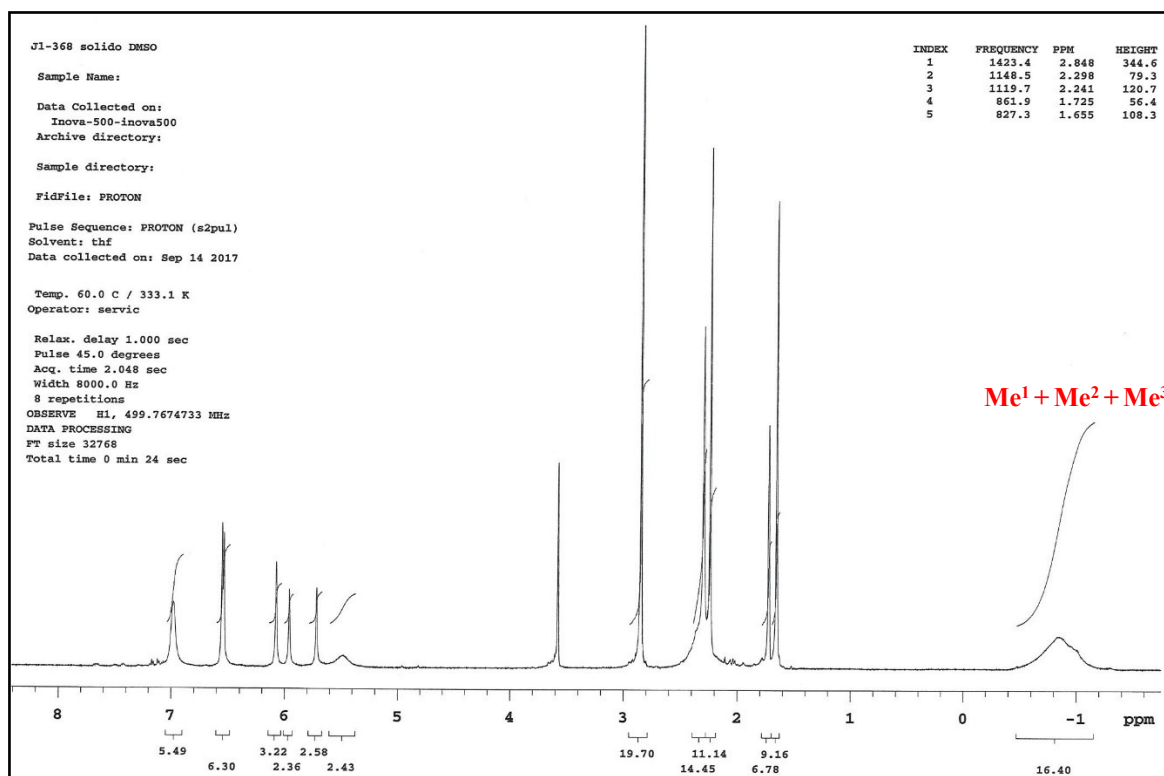

(b)

**Figure S10.**  $^1\text{H}$  NMR spectra ( $\text{thf-}d_8$ ) in the region of the methyl groups for complex  $[\text{Zn}(\text{Me})(\text{bpzampe})\text{Zn}(\text{Me})_2]$  (**13**) at 25°C (a) and 60°C (b).

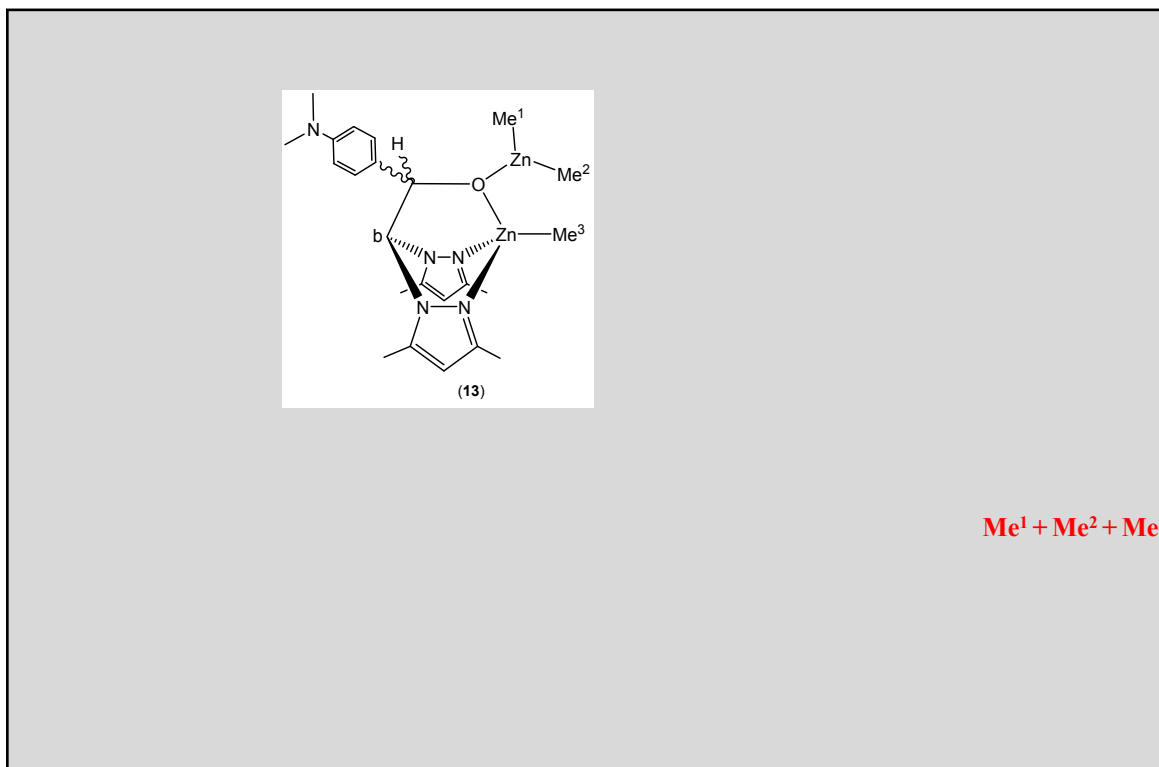

(a)

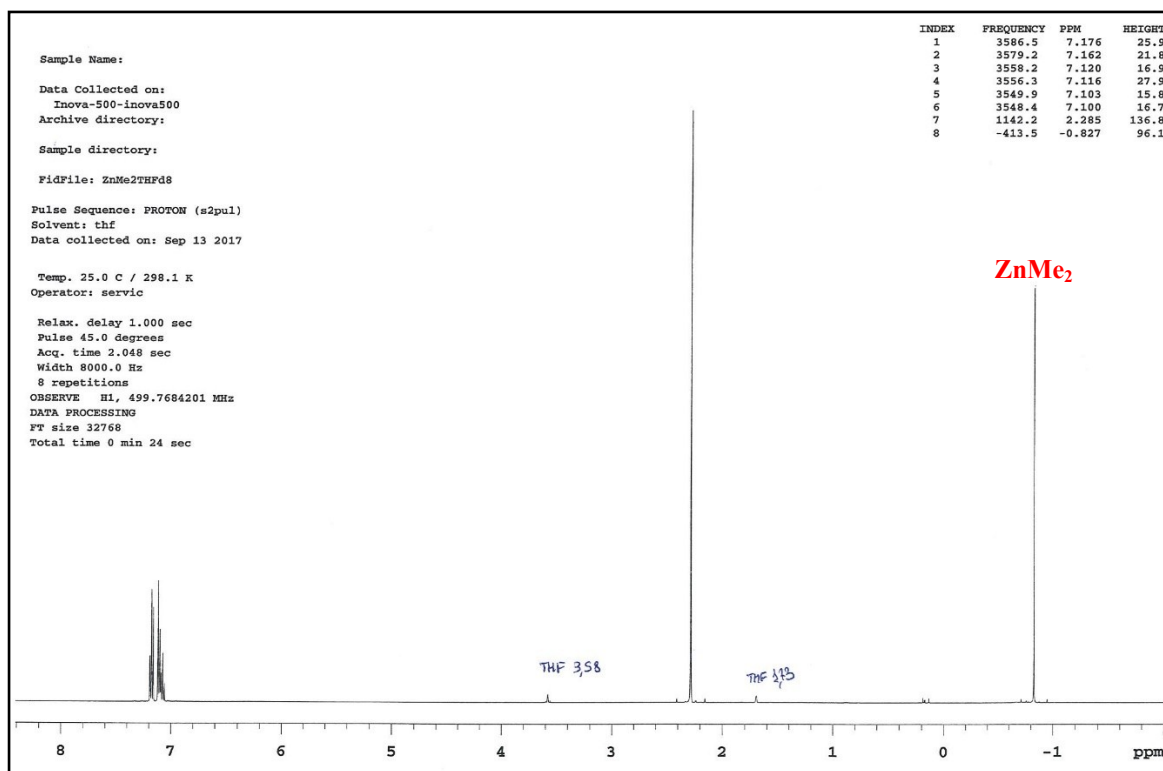

**Figure S11.**  $^1\text{H}$  NMR spectra ( $\text{thf-}d_8$ ,  $25^\circ\text{C}$ ) for complex  $[\text{Zn}(\text{Me})(\text{bpzampe})\text{Zn}(\text{Me})_2]$  (**13**) (a) and commercial  $\text{ZnMe}_2$  in toluene 2M (b).

22/05/2017 10:59:23 1 / 1

==== Shimadzu LCsolution Analysis Report ====

C:\LabSolutions\Data\gpcresultados\2016\Sonia\PLA03.lcd  
 Acquired by : Admin  
 Sample Name : PLA3  
 Sample ID : PLA3  
 Vial # :  
 Injection Volume : 20 uL  
 Data File Name : PLA03.lcd  
 Method File Name : Calibrado2014.OK.lcm  
 Batch File Name : SingleRun120160225171047.lcb  
 Report File Name : Default.lcr  
 Data Acquired : 25/02/2016 18:10:58  
 Data Processed : 22/05/2017 10:45:24

<Chromatogram>

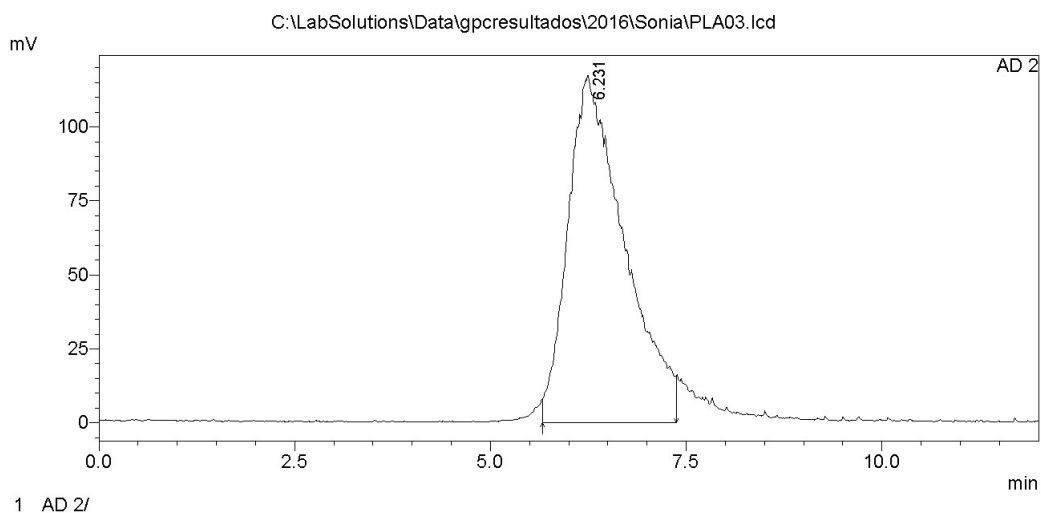

Chromatogram AD 2

GPC Summary

| # | Title     | Mn    | Mw    | Mv    | Mw/Mn   |
|---|-----------|-------|-------|-------|---------|
| 1 | PLA03.lcd | 15914 | 17125 | 0     | 1.07608 |
|   | Average   | 15914 | 17125 | 0     | 1.07608 |
|   | %RSD      | 0.000 | 0.000 | 0.000 | 0.000   |
|   | Maximum   | 15914 | 17125 | 0     | 1.07608 |
|   | Minimum   | 15914 | 17125 | 0     | 1.07608 |
|   | SD        | 0     | 0     | 0     | 0.00000 |

**Figure S12.** GPC trace corresponding to a poly(*rac*-lactide) prepared from catalyst [Zn(Me)(bpzampe)Zn(Me)<sub>2</sub>] (**13**) (Table 2, entry 20).

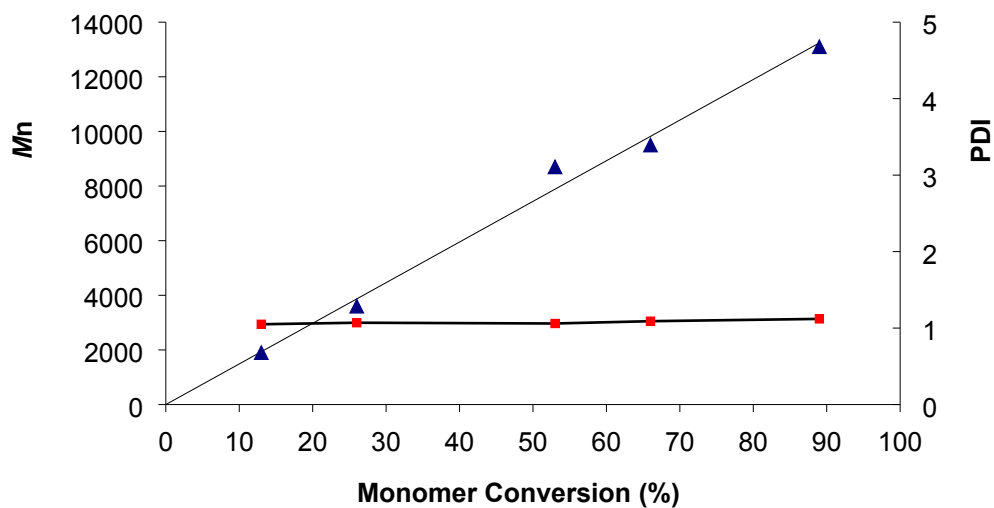

**Figure S13.** Plot of PLA  $M_n$  and molecular weight distribution values (PDI) as a function of monomer conversion (%) for the polymerization of *rac*-LA initiated by  $[\text{Zn}(\text{Me})(\text{bpzaepe})]$  (**7**);  $[\text{rac-LA}]_0/[\text{Zn}]_0 = 100$ , tetrahydrofuran, 20 °C (Table 2, entries 6–10,  $R^2 = 0.993$ ).



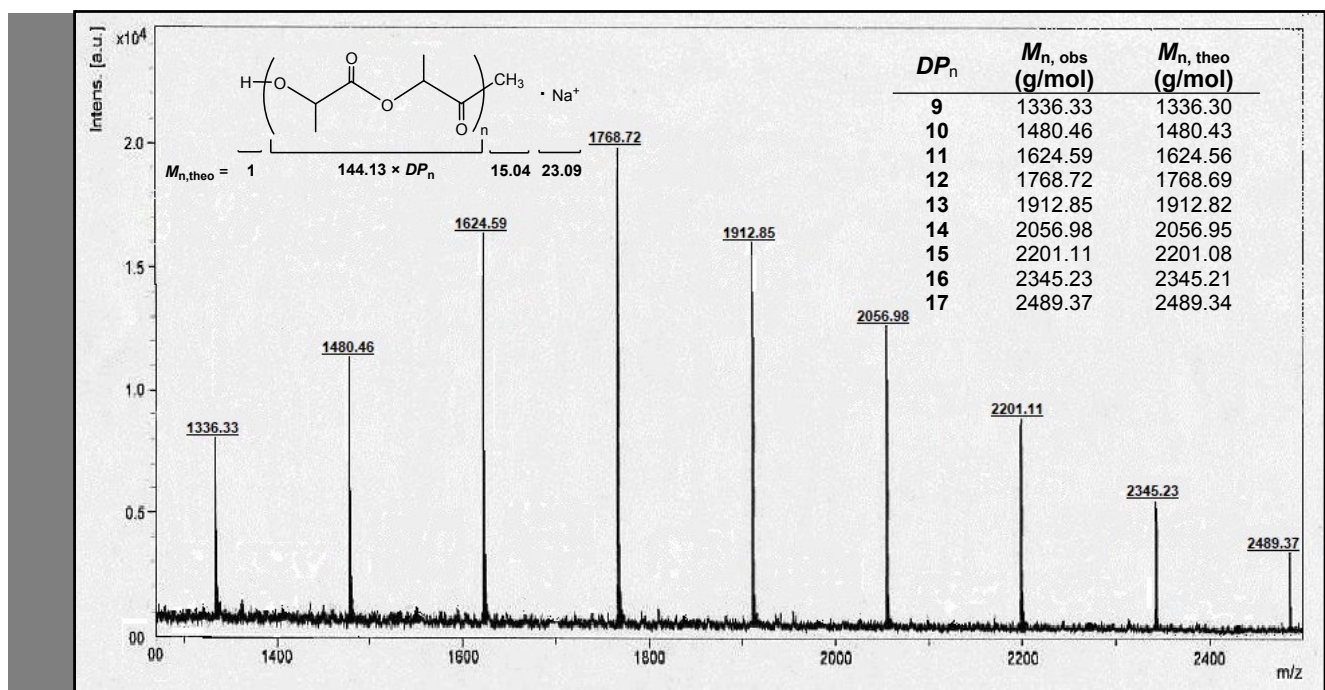

**Figure S14a.** Selected area of the MALDI-ToF mass spectrum of a PLA sample obtained on using initiator  $[\text{Zn}(\text{Me})(\text{bpzaepe})]$  (**7**) with  $[\text{rac-LA}]_0/[\text{Zn}]_0 = 20$ , 85% conversion; theoretical molecular weights calculated according to the equation:  $M_n = (DP_n \times M_{\text{wLA}}) + M_{\text{wMeH}} + M_{\text{wNa}}$ , where  $DP_n$  is the degree of polymerization,  $M_{\text{wLA}} = 144.13 \text{ g}\cdot\text{mol}^{-1}$ ,  $M_{\text{wMeH}} = 16.04 \text{ g}\cdot\text{mol}^{-1}$  and  $M_{\text{wNa}} = 23.09 \text{ g}\cdot\text{mol}^{-1}$ .

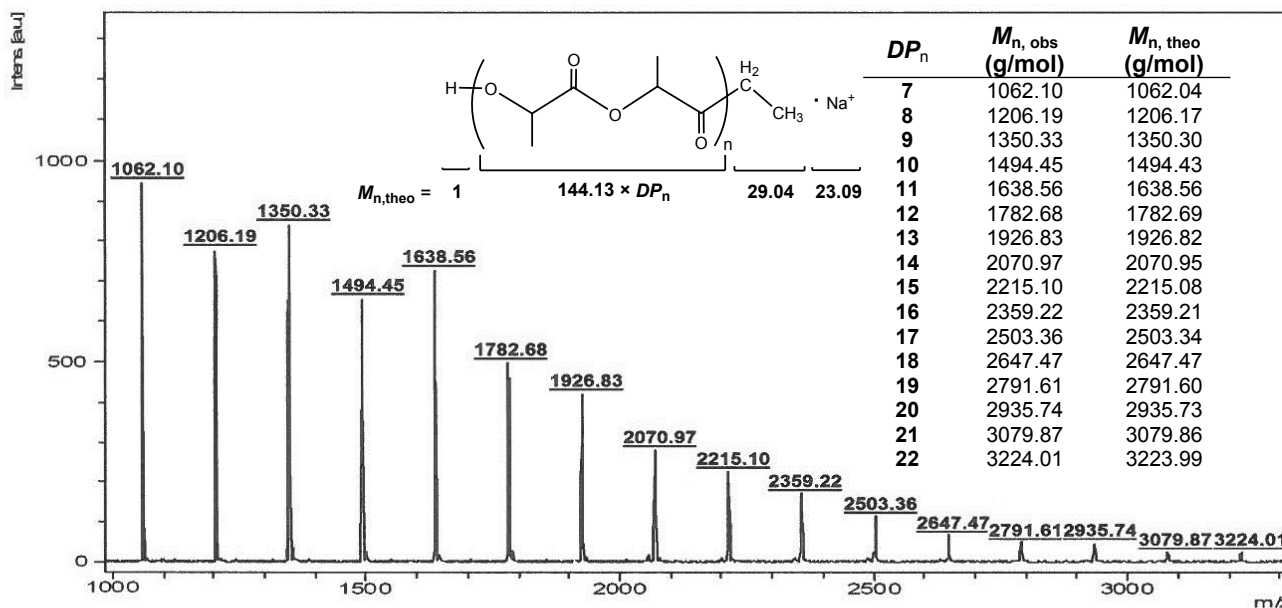

**Figure S14b.** Selected area of the MALDI-ToF mass spectrum of a PLA sample obtained on using initiator [Zn(Et)(bpzaepe)] (**8**) with  $[rac\text{-LA}]_0/[Zn]_0 = 30$ , 73% conversion; theoretical molecular weights calculated according to the equation:  $M_n = (DP_n \times M_{wLA}) + M_{wEtH} + M_{wNa}$ , where  $DP_n$  is the degree of polymerization,  $M_{wLA} = 144.13 \text{ g}\cdot\text{mol}^{-1}$ ,  $M_{wEtH} = 30.04 \text{ g}\cdot\text{mol}^{-1}$  and  $M_{wNa} = 23.09 \text{ g}\cdot\text{mol}^{-1}$ .

The distribution in the spectrum indicates the existence of a single family of polymer chains capped by  $-\text{CH}(\text{CH}_3)\text{OH}$ , and  $(\text{CH}_3-\text{OC}(\text{O})-$  and  $(\text{CH}_3-\text{CH}_2-\text{OC}(\text{O})-$  *termini* for **7** and **8**, respectively, corresponding to oligomers of formula  $\text{H}(\text{OCHMeCO})_{2n}(\text{CH}_3)\cdot\text{Na}^+$  ( $n = 9$  to  $17$ ) and  $\text{H}(\text{OCHMeCO})_{2n}(\text{CH}_2-\text{CH}_3)\cdot\text{Na}^+$  ( $n = 7$  to  $22$ ), respectively, with consecutive peaks separated by increments of 144 Da (Figure S13a and S13b, respectively). Moreover, neither intermolecular ester-exchange (transesterification) reactions nor cyclic oligomers were detected.

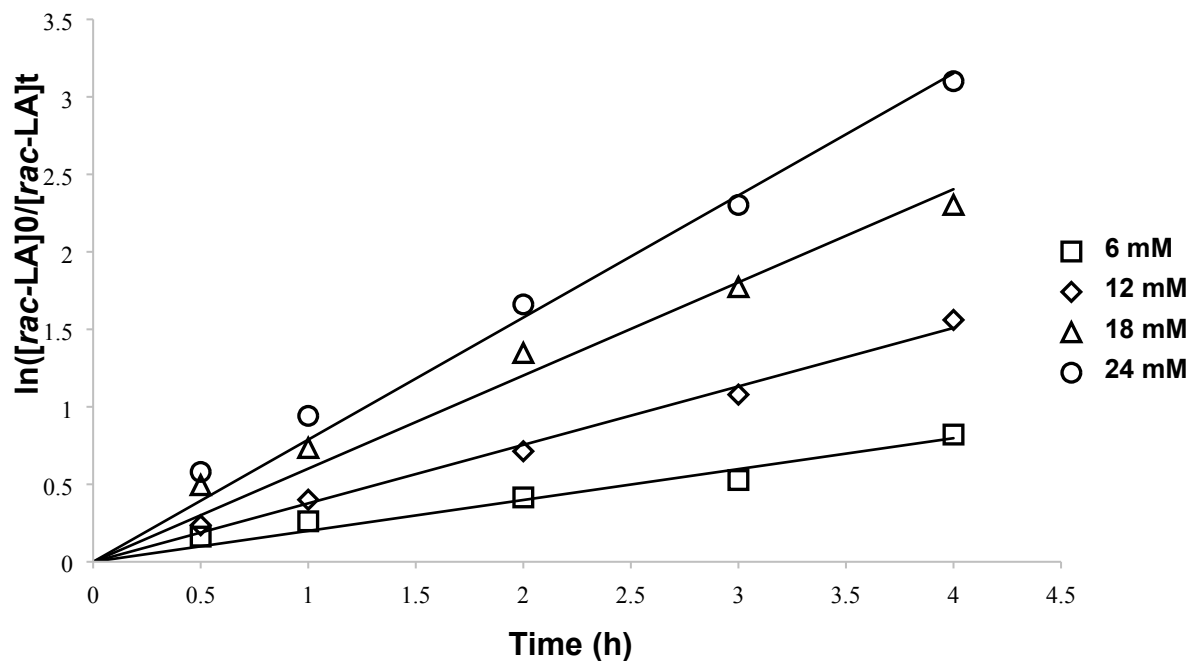

**Figure S15.** Pseudo-first-order kinetic plots for the polymerization of *rac*-LA in tetrahydrofuran at 20°C employing [Zn(Me)(bpzape)] (**7**) as catalyst ( $[rac-LA]_0 = 0.80$  M).

In all cases, the linearity of the semi-logarithmic plot of  $\ln ([rac-LA]_0/[rac-LA]_t)$  versus reaction time for catalyst **7** at 20°C, employing different initial catalyst concentrations, shows that the propagations were first order with respect to *rac*-LA monomer (Figure S14) (square correlation coefficients  $\geq 0.97$ ).

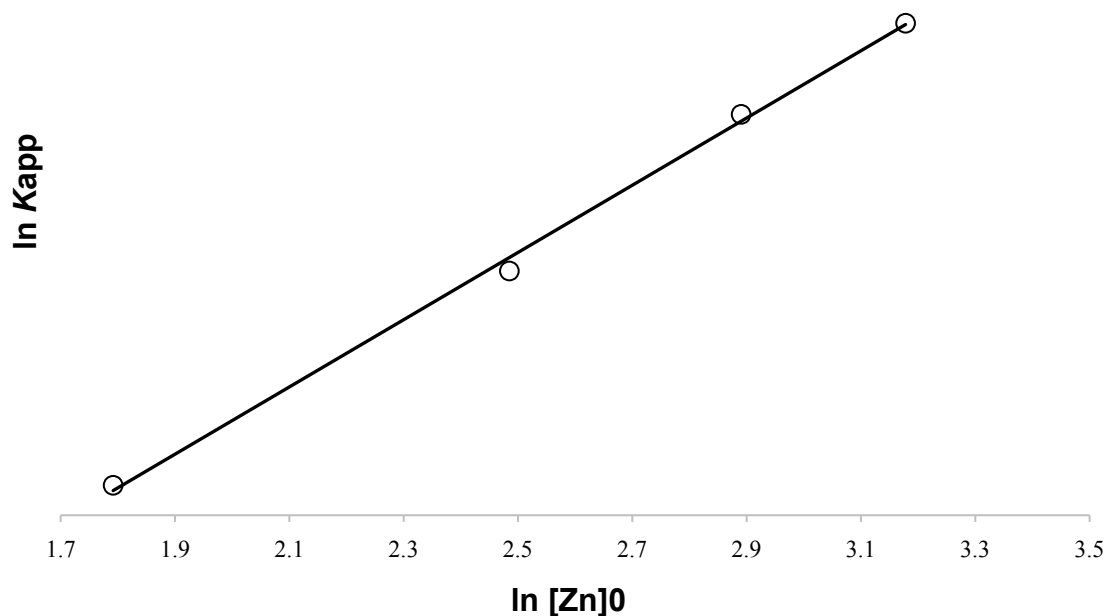

**Figure S16.** Plot of  $\ln k_{\text{app}}$  versus  $\ln [\text{catalyst}]_0$  for the polymerization of *rac*-LA employing initiator  $[\text{Zn}(\text{Me})(\text{bpzaepe})]$  (**7**) in tetrahydrofuran at 20°C, with  $[\text{rac-LA}]_0 = 0.75$  mol/L.

The kinetic dependence on the catalyst concentration ( $n$ ) and the propagation rate constant ( $k_p$ ) confirms that the reaction is also first order in catalysts **7** at 20°C (Figure S15). These values prove that the polymerization of *rac*-LA mediated by this initiator obeys an overall second-order rate kinetic law of the form:

$$-d[\text{rac-LA}]/dt = k_p[\text{catalyst}]^1[\text{rac-LA}]^1$$

**Table S1.** Rate constants dependence on the initial concentration of [Zn(Me)(bpzaepe)] (7) for *rac*-LA polymerization at 20°C.

| [catalyst] <sub>0</sub> × 10 <sup>3</sup> (M) | <i>k</i> <sub>app</sub> × 10 <sup>5</sup> (s <sup>-1</sup> ) | <i>k</i> <sub>p</sub> × 10 <sup>3</sup> (M <sup>-1</sup> ·s <sup>-1</sup> ) | <i>n</i>    |
|-----------------------------------------------|--------------------------------------------------------------|-----------------------------------------------------------------------------|-------------|
| 8                                             | 5.5 ± 0.3                                                    | 8.5 ± 0.6                                                                   | 1.04 ± 0.03 |
| 12                                            | 11.1 ± 0.2                                                   |                                                                             |             |
| 18                                            | 16.7 ± 0.7                                                   |                                                                             |             |
| 20                                            | 23.7 ± 0.8                                                   |                                                                             |             |

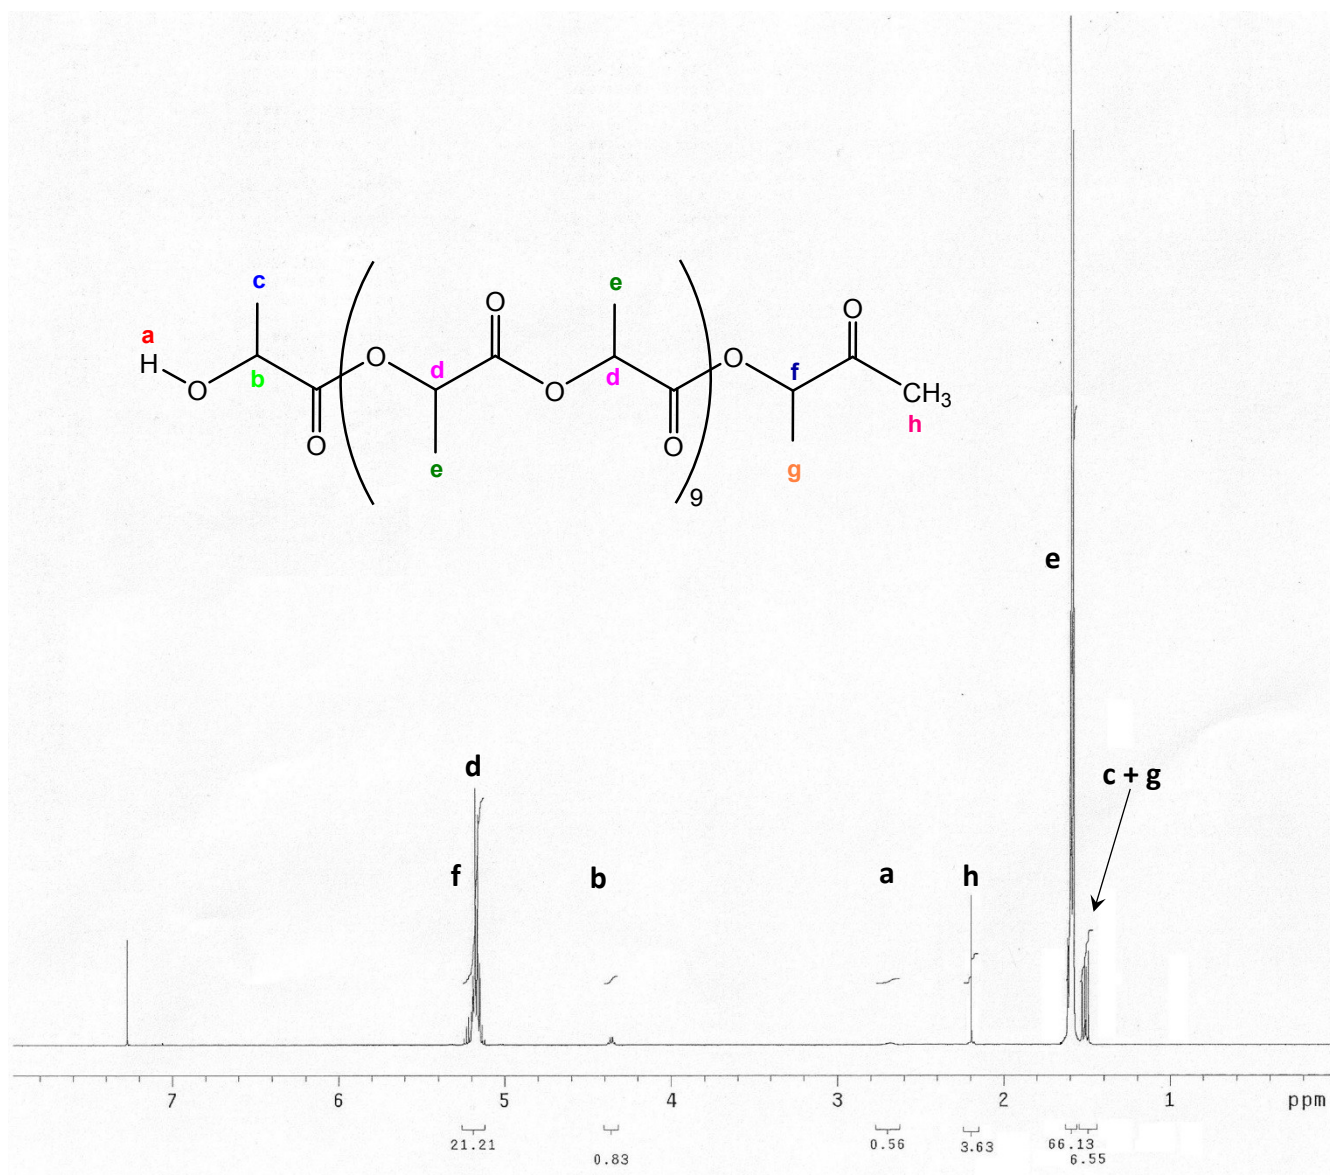

**Figure S17.** <sup>1</sup>H NMR spectrum (400 MHz, 298 K, CDCl<sub>3</sub>) of PLA prepared by the polymerization of *rac*-LA initiated by [Zn(Me)(bpzaepe)] (7) at 67% of conversion showing all resonances and assignments, including the chain *termini* ( $[rac\text{-LA}]_0/[Zn]_0 = 15$ , tetrahydrofuran, 20 °C).

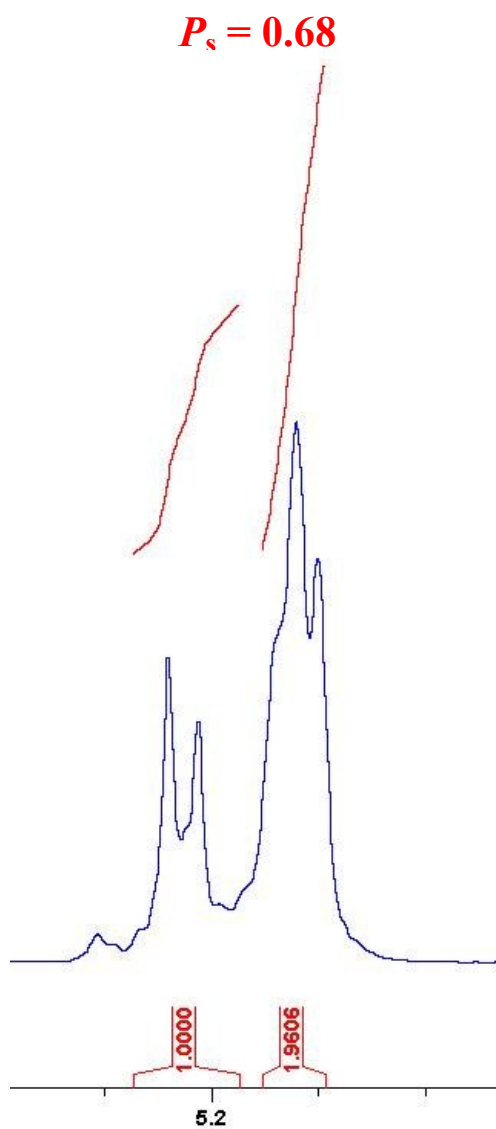

**Figure S18.**  $^1\text{H}$  NMR spectrum (400 MHz, 298 K,  $\text{CDCl}_3$ ) of the homodecoupled  $\text{CH}$  resonance of poly(*rac*-lactide) prepared employing  $[\text{Zn}(\text{Me})(\text{bpzaepe})]$  (**7**) in tetrahydrofuran at  $0^\circ\text{C}$  for 24 h (Table 2, entry 5). The tacticity of the polymer was assigned using the methine signals with homonuclear decoupling, as described by Hillmyer and co-workers.<sup>1</sup>

**Table S2.** Crystal data and structure refinement for **4** and **5**.

|                                              | <b>4</b>                                            | <b>5</b>                                            |
|----------------------------------------------|-----------------------------------------------------|-----------------------------------------------------|
| Empirical formula                            | C <sub>21</sub> H <sub>29</sub> N <sub>5</sub> O Zn | C <sub>22</sub> H <sub>31</sub> N <sub>5</sub> O Zn |
| Formula weight                               | 432.86                                              | 446.89                                              |
| Temperature (K)                              | 240(2)                                              | 240(2)                                              |
| Wavelength (Å)                               | 0.71073                                             | 0.71073                                             |
| Crystal system                               | Monoclinic                                          | Monoclinic                                          |
| Space group                                  | P 2 <sub>1</sub> /c                                 | P 2 <sub>1</sub> /c                                 |
| a(Å)                                         | 13.201(3)                                           | 12.951(3)                                           |
| b(Å)                                         | 15.952(3)                                           | 16.222(4)                                           |
| c(Å)                                         | 10.310(2)                                           | 10.789(3)                                           |
| β(°)                                         | 91.966(3)                                           | 92.045(4)                                           |
| Volume(Å <sup>3</sup> )                      | 2169.9(7)                                           | 2265.1(10)                                          |
| Z                                            | 4                                                   | 4                                                   |
| Density (calculated) (g/cm <sup>3</sup> )    | 1.325                                               | 1.310                                               |
| Absorption coefficient (mm <sup>-1</sup> )   | 1.152                                               | 1.106                                               |
| F(000)                                       | 912                                                 | 944                                                 |
| Crystal size (mm <sup>3</sup> )              | 0.28 x 0.18 x 0.12                                  | 0.21 x 0.15 x 0.09                                  |
| Index ranges                                 | -15 ≤ h ≤ 15                                        | -15 ≤ h ≤ 15                                        |
|                                              | -18 ≤ k ≤ 17                                        | -14 ≤ k ≤ 19                                        |
|                                              | -12 ≤ l ≤ 12                                        | -12 ≤ l ≤ 12                                        |
| Reflections collected                        | 14175                                               | 13960                                               |
| Independent reflections                      | 3822 [R(int) = 0.0533]                              | 3981 [R(int) = 0.1269]                              |
| Data / restraints / parameters               | 3822 / 0 / 260                                      | 3981 / 0 / 262                                      |
| Goodness-of-fit on F <sup>2</sup>            | 1.020                                               | 0.959                                               |
| Final R indices [ <i>I</i> > 2σ( <i>I</i> )] | R1 = 0.0419, wR2 = 0.0933                           | R1 = 0.0583, wR2 = 0.1201                           |
| Largest diff. peak / hole, e.Å <sup>-3</sup> | 0.258 / -0.310                                      | 0.339 / -0.345                                      |

<sup>a</sup>  $R = \sum ||F_o| - |F_c| / \sum |F_o|$ . <sup>b</sup>  $wR = \{ \sum w(F_o^2 - F_c^2)^2 / \sum w(F_o^2)^2 \}^{1/2}$ . <sup>c</sup> GOF =  $\{ \sum [w((F_o^2 - F_c^2)^2) / (n-p)] \}^{1/2}$ , where *n* = number of reflections and *p* = total number of parameters refined.



**References**

- (1) M. T. Zell, B. E. Padden, A. J. Paterick, K. A. M. Thakur, R. T. Kean, M. A. Hillmyer, E. J. Munson, *Macromolecules*, 2002, **35**, 7700–7707.
